# Supplementary material for: Three-dimensional visualization of the microvasculature of bile duct ligation-induced liver fibrosis in rats by x-ray phase-contrast imaging computed tomography
Source: PubMed Central journal article supplement (PMC4515745; doi:10.1038/srep11500), 2015-07-27
Supplement: srep11500-s1.pdf [file srep11500-s1.pdf]

**Three-dimensional visualization of the microvasculature of bile duct  
ligation-induced liver fibrosis in rats by x-ray phase-contrast imaging computed  
tomography**

**Ruijiao Xuan<sup>1\*</sup>, Xinyan Zhao<sup>2\*</sup>, Chunhong Hu<sup>1</sup>, Doudou Hu<sup>2</sup>, Jianbo Jian<sup>1</sup>,  
Tailing Wang<sup>3</sup>**

<sup>1</sup>College of Biomedical Engineering, Tianjin Medical University, Tianjin 300070, China, <sup>2</sup>Liver Research Center, Beijing Friendship Hospital, Capital Medical University, Beijing 100050, China, <sup>3</sup>Department of Pathology, China-Japan Friendship Hospital, Beijing 100029, China.

**Supporting information legends**

**Video S1. Animated view of the 3D microvascular structures of the severe liver fibrosis sample.** This is the same 3D model shown in Fig.6. The rotation of the model permits the viewers to better observe microvascular structures, and differentiate the different types of blood vessels.
